# Supplementary material for: Association of renal regional tissue oxygen saturation and post-procedural acute kidney injury following transcatheter aortic valve implantation
Source: Research Square preprint supplement (doi:10.21203/rs.3.rs-6487228/v1), 2025-05-08
Supplement: Supplementary file 1 [file 421b500e183c8310f765868e.docx]

**Supplementary Table S1**. Univariable logistic regression analysis of risk factors for post-procedural acute kidney injury following transcatheter aortic valve implantation.

| Variables | OR (95% CI) | *p* value | Marginal effect* (95% CI) |
| --- | --- | --- | --- |
| Male sex | 1.852 (0.644, 5.321) | 0.253 | 13.3 (–8.7, 35.3) |
| Dyslipidemia | 0.395 (0.122, 1.273) | 0.120 | –19.7 (–42.9, 3.5) |
| Use of pre-procedural statin | 0.535 (0.184, 1.553) | 0.250 | –13.5 (–35.7, 8.7) |
| Contrast media volume | 1.005 (0.998, 1.012) | 0.167 | 0.1 (0, 0.3) |
| Duration of procedure | 1.018 (0.995, 1.040) | 0.120 | 0.4 (–0.1, 0.8) |
| Baseline renal rSO2 (per 1% increase) | 0.962 (0.919, 1.007) | 0.093 | –0.8 (–1.7, 0.1) |
| % change of nadir rSO2 from baseline (per 1% decrease) | 0.984 (0.948, 1.021) | 0.391 | –0.4 (–1.2, 0.4) |

* Marginal effect was estimated using the average of the marginal effects over the observations (average marginal effect) from logistic regression model.

CI, confidence interval; OR, odds ratio; rSO2, regional tissue oxygen saturation.

**Supplementary Table S2.** Comparison of clinical outcomes between patients with and without acute kidney injury after transcatheter aortic valve implantation.

|  | Post-procedural AKI  (n = 21) | No post-procedural AKI  (n = 43) | *p* value |
| --- | --- | --- | --- |
| Delirium | 4 (19%) | 0 (0%) | 0.009 |
| Stroke | 0 (0%) | 0 (0%) | N/A |
| Myocardial infarction | 0 (0%) | 0 (0%) | N/A |
| Post-procedural hospital stay, day | 7 (5, 8) | 6 (5, 6) | 0.176 |
| In-hospital mortality | 0 (0%) | 0 (0%) | N/A |

Data are presented as number (proportion) or median (interquartile range).

AKI, acute kidney injury; N/A, not assessed.
